# Supplementary material
Source: HighWire-hosted journal article supplement (https://jnm.snmjournals.org/highwire/filestream/93938/field_highwire_adjunct_files/0/47423_Supplemental_Figures.pdf)
Supplement: 47423_Supplemental_Figures.pdf [file 47423_Supplemental_Figures.pdf]

Figure 1S. NOTA-RGD and cold Ga-NOTA-RGD showed different  $R_f$  values by HPLC chromatogram. NOTA-RGD appeared at 13.1 min and Ga-NOTA-RGD appeared at 12.4 min. Column: XTerra prep column RP18, 10 mm  $\times$  250 mm; Solvent: 0~100% ethanol gradient from 0~30 min in 0.01% TFA; Flow rate: 3 mL/min.

Figure 2S. Analysis of  $^{68}\text{Ga}$ -NOTA-RGD using ITLC-SG. After spotting with reaction mixtures, the plates were eluted using 0.1 M citric acid and  $^{68}\text{Ga}$ -NOTA-RGD remained at the origin, whereas free  $^{68}\text{Ga}$  moved with the solvent front which is not clearly seen in this chromatogram due to tailing (A). When eluted with 0.1 M sodium carbonate the situation was reversed,  $^{68}\text{Ga}$ -NOTA-RGD moved with the solvent front while free  $^{68}\text{Ga}$  remained at the origin (B). A purified preparation was eluted with 0.1 M citric acid and only the  $^{68}\text{Ga}$ -NOTA-RGD peak at the origin was found (C), and when eluted by 0.1 M sodium carbonate only  $^{68}\text{Ga}$ -NOTA-RGD moving at the solvent front was detected (D).

Figure 3S. Purification of  $^{68}\text{Ga}$ -NOTA-RGD by HPLC. Free  $^{68}\text{Ga}$  appeared at 4.2 min and  $^{68}\text{Ga}$ -NOTA-RGD appeared at 12.6 min on radioactivity detector profile. Unlabeled NOTA-RGD appeared at 13.7 min on UV detection profile. Column: XTerra prep column RP18, 10 mm  $\times$  250 mm; Solvent: 0~100% ethanol gradient from 0~30 min in 0.01% TFA; Flow rate: 3 mL/min.

Figure 4S. Paper electrophoresis (0.2 M phosphate buffer (pH 7.0)) showed that  $^{68}\text{Ga}$ -NOTA-RGD moved to cathode indicating that it was positively charged at pH 7.0.

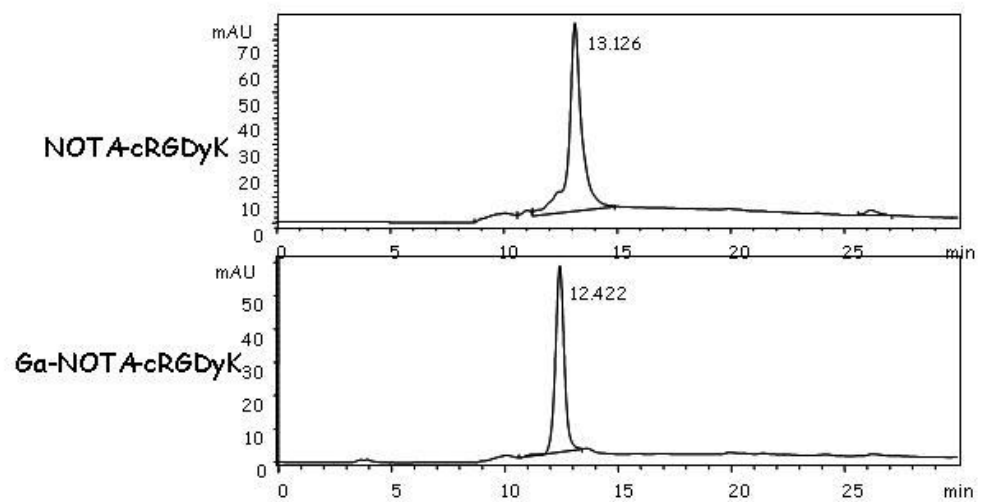

Figure 1S.

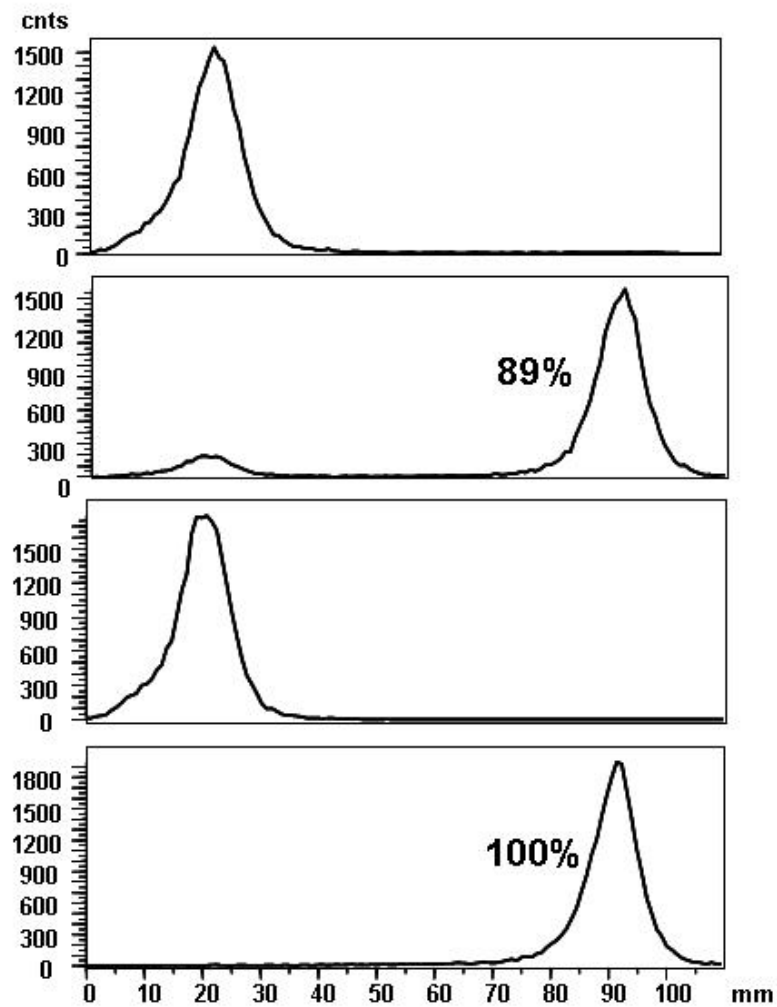

Figure 2S.

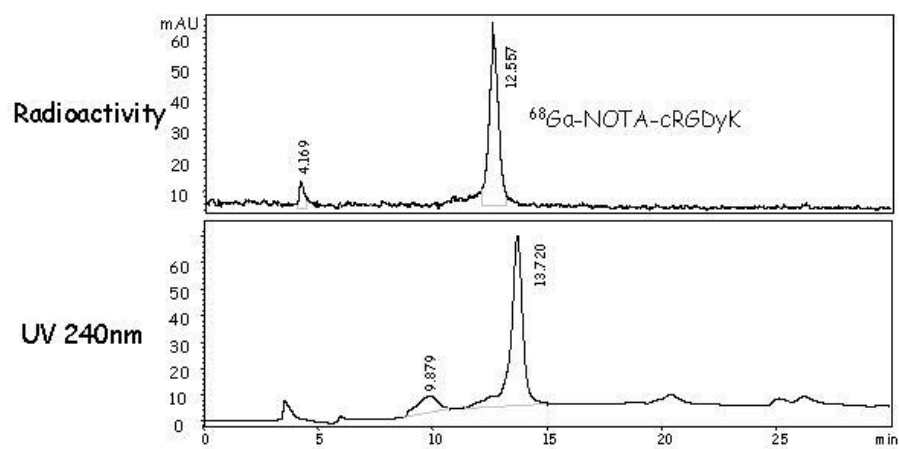

Figure 3S.

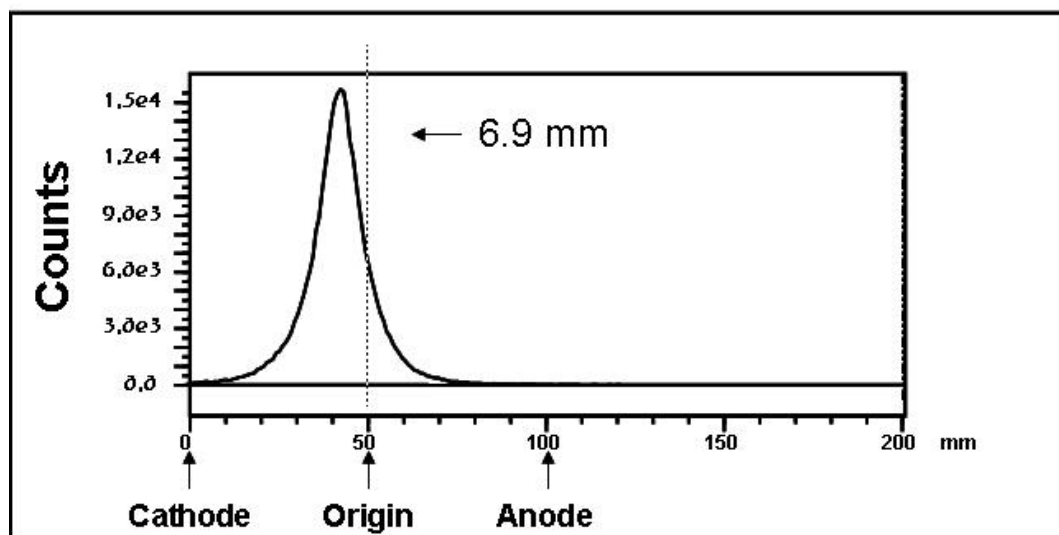

Figure 4S.
